# Supplementary material for: Fluorescent probes based on acridine derivatives and their application in dynamic monitoring of cell polarity variation
Source: Royal Society of Chemistry journal article supplement (doi:10.1039/d2an01449a), 2022-01-01
Supplement: d2an01449a1.pdf [file d2an01449a1.pdf]

## Fluorescent probes based on acridine derivatives and their application in dynamic monitoring of cell polarity variation

Hai-Yan Peng,<sup>a</sup> Gang Zhang,<sup>b</sup> Ru Sun,<sup>\*,a</sup> Yu-Jie Xu,<sup>b</sup> Jian-Feng Ge<sup>\*,a</sup>

<sup>a</sup> College of Chemistry, Chemical Engineering and Material Science, Soochow University, 199  
Ren' Ai Road, Suzhou 215123, China.

<sup>b</sup> State Key Laboratory of Radiation Medicine and Protection, School of Radiation Medicine and  
Protection and Collaborative Innovation Center of Radiation Medicine of Jiangsu Higher  
Education Institutions, Soochow University, Suzhou 215123, China.

### Index

|                                                                                                                                                                                                                                                                                                                                                                                                                                 |   |
|---------------------------------------------------------------------------------------------------------------------------------------------------------------------------------------------------------------------------------------------------------------------------------------------------------------------------------------------------------------------------------------------------------------------------------|---|
| <b>Table S1.</b> Optical properties of probe <b>1a</b> in different solvents .....                                                                                                                                                                                                                                                                                                                                              | 4 |
| <b>Table S2.</b> Optical properties of probe <b>1b</b> in different solvents .....                                                                                                                                                                                                                                                                                                                                              | 4 |
| <b>Table S3.</b> Optical properties of probes <b>1c-d</b> in H <sub>2</sub> O and glycerol .....                                                                                                                                                                                                                                                                                                                                | 4 |
| <b>Fig. S1.</b> Photofading behaviors of probes <b>1a-d</b> in acetonitrile .....                                                                                                                                                                                                                                                                                                                                               | 5 |
| <b>Fig. S2.</b> Optical properties of probe <b>1b</b> (10 μM) in different solvents. (a) Absorption spectra; (b) emission spectra (excited at 362 nm, slit widths: 5 nm/10 nm).....                                                                                                                                                                                                                                             | 5 |
| <b>Fig. S3.</b> Emission spectra of probes <b>1c-d</b> in different solvents. (a) emission spectra of <b>1c</b> ; (b) emission spectra of <b>1d</b> .....                                                                                                                                                                                                                                                                       | 5 |
| <b>Fig. S4.</b> Optical responses of probe <b>1b</b> (10 μM) in dioxane/H <sub>2</sub> O mixtures with increasing polarity (water from 10% to 100%). (a)Absorption spectra; (b)emission spectra (λ <sub>ex</sub> =362 nm, slit widths: 5 nm/10 nm); (c) relationship between fluorescence intensity (570 nm) and Δ <i>f</i> ; (d) linear relationship of fluorescence intensity at 570 nm versus Δ <i>f</i> (0.238–0.315) ..... | 6 |
| <b>Fig. S5.</b> Optical responses of probe <b>1d</b> (10 μM) in glycerol/H <sub>2</sub> O mixtures with increasing viscosity                                                                                                                                                                                                                                                                                                    |   |

\* Corresponding authors. E-mail addresses: [sunru924@hotmail.com](mailto:sunru924@hotmail.com) (R. Sun), [ge\\_jianfeng@hotmail.com](mailto:ge_jianfeng@hotmail.com) (J.-F. Ge).

|                                                                                                                                                                                                                                                                                                                                                                                                                                                                                                                                                                                                         |    |
|---------------------------------------------------------------------------------------------------------------------------------------------------------------------------------------------------------------------------------------------------------------------------------------------------------------------------------------------------------------------------------------------------------------------------------------------------------------------------------------------------------------------------------------------------------------------------------------------------------|----|
| (water from 100% to 1%). (a)Absorption spectra; (b)emission spectra ( $\lambda_{\text{ex}}=282$ nm, slit widths: 5 nm/10 nm); (c)relationship between $\lg(I_{311\text{nm}})$ and $\lg\eta$ ; (d)linear relationship of $\lg(I_{311\text{nm}})$ versus $\lg\eta$ .....                                                                                                                                                                                                                                                                                                                                  | 6  |
| <b>Fig. S6.</b> The fluorescence spectra of probe <b>1a</b> (10 $\mu\text{M}$ ) in $\text{H}_2\text{O}$ /glycerol mixture under different viscosity .....                                                                                                                                                                                                                                                                                                                                                                                                                                               | 7  |
| <b>Fig. S7.</b> The fluorescence spectra of probe <b>1b</b> (10 $\mu\text{M}$ ) in $\text{H}_2\text{O}$ /glycerol mixture under different viscosity .....                                                                                                                                                                                                                                                                                                                                                                                                                                               | 7  |
| <b>Fig. S8.</b> Selectivity experiments of probes <b>1b-d</b> (10 $\mu\text{M}$ ) toward different analytes. 5 mM for $\text{Ca}^{2+}$ , $\text{Mg}^{2+}$ , $\text{Cu}^{2+}$ , $\text{Cl}^-$ , $\text{OCl}^-$ , $\text{H}_2\text{O}_2$ ; 10 mM for $\text{K}^+$ , $\text{Na}^+$ , Cys, Gly, His. (a)probe <b>1b</b> ( $\lambda_{\text{ex}}=362$ nm, slit widths: 5 nm/10 nm). (b)probe <b>1c</b> ( $\lambda_{\text{ex}}=360$ nm, slit widths: 5 nm/10 nm). (c)probe <b>1d</b> ( $\lambda_{\text{ex}}=282$ nm, slit widths: 5 nm/10 nm).....                                                             | 7  |
| <b>Fig. S9.</b> HeLa cells viabilities after treatment with probes <b>1a-c</b> . Cell viability was assayed by the CCK-8 method .....                                                                                                                                                                                                                                                                                                                                                                                                                                                                   | 8  |
| <b>Fig. S10.</b> Fluorescence intensity of probe <b>1b</b> at different pH .....                                                                                                                                                                                                                                                                                                                                                                                                                                                                                                                        | 8  |
| <b>Fig. S11.</b> Fluorescence confocal images of living HeLa cells with probe <b>1c</b> and ROI analysis: (a, f, k) confocal image (green channel) of cells with probe <b>1c</b> (6 $\mu\text{M}$ ); (b, g, l) confocal image (red channel) of cells with Lyso-Tracker Red DND-99 (100 nM), Gi-Tracker Red (100 nM) or Mito-Tracker <sup>®</sup> Red CMXRos (100 nM); (c, h, m) merged image of the green and red channels; (d, i, n) fluorescence intensity correlation plot of the green and red channels; (e, j, o) fluorescence intensities of the regions of interest (ROIs) across the cells..... | 9  |
| <b>Fig. S12.</b> Photobleaching experiment of probe <b>1c</b> . (a-f) The cell image of probe <b>1c</b> after laser irradiation for different times in HeLa cells. (g) average fluorescence intensity of green channel after irradiation for different times .....                                                                                                                                                                                                                                                                                                                                      | 9  |
| <b>Fig. S13.</b> $^1\text{H}$ NMR spectrum of probe <b>1a</b> .....                                                                                                                                                                                                                                                                                                                                                                                                                                                                                                                                     | 10 |
| <b>Fig. S14.</b> $^{13}\text{C}$ NMR spectrum of probe <b>1a</b> .....                                                                                                                                                                                                                                                                                                                                                                                                                                                                                                                                  | 10 |
| <b>Fig. S15.</b> HRMS(ESI <sup>+</sup> ) spectrum of probe <b>1a</b> .....                                                                                                                                                                                                                                                                                                                                                                                                                                                                                                                              | 11 |
| <b>Fig. S16.</b> $^1\text{H}$ NMR spectrum of probe <b>1b</b> .....                                                                                                                                                                                                                                                                                                                                                                                                                                                                                                                                     | 11 |

|                                                                        |    |
|------------------------------------------------------------------------|----|
| <b>Fig. S17.</b> $^{13}\text{C}$ NMR spectrum of probe <b>1b</b> ..... | 12 |
| <b>Fig. S18.</b> HRMS(ESI $^{+}$ ) spectrum of probe <b>1b</b> .....   | 12 |
| <b>Fig. S19.</b> $^1\text{H}$ NMR spectrum of probe <b>1c</b> .....    | 13 |
| <b>Fig. S20.</b> HRMS(ESI $^{+}$ ) spectrum of probe <b>1c</b> .....   | 13 |
| <b>Fig. S21.</b> $^1\text{H}$ NMR spectrum of probe <b>1d</b> .....    | 14 |
| <b>Fig. S22.</b> HRMS(ESI $^{+}$ ) spectrum of probe <b>1d</b> .....   | 14 |

**Table S1.** Optical properties of probe **1a** in different solvents.

| Probe     | Solvents         | $\Delta f$ | $\lambda_{\text{Abs,max}}^{\text{a}}$ | $\lambda_{\text{Em,max}}^{\text{a}}$ | Stokes shift <sup>a</sup> | $\epsilon^{\text{b}}$ | $\Phi^{\text{c}}$ |
|-----------|------------------|------------|---------------------------------------|--------------------------------------|---------------------------|-----------------------|-------------------|
| <b>1a</b> | H <sub>2</sub> O | 0.3200     | 355                                   | 594                                  | 239                       | 2.47                  | 0.50              |
| <b>1a</b> | DMSO             | 0.2640     | 351                                   | 583                                  | 232                       | 3.34                  | 3.06              |
| <b>1a</b> | MeCN             | 0.3040     | 345                                   | 580                                  | 235                       | 3.26                  | 3.43              |
| <b>1a</b> | MeOH             | 0.3092     | 345                                   | 574                                  | 229                       | 3.88                  | 3.83              |
| <b>1a</b> | EtOH             | 0.2887     | 345                                   | 570                                  | 225                       | 4.46                  | 5.24              |
| <b>1a</b> | DCM              | 0.2170     | 346                                   | 560                                  | 214                       | 3.85                  | 5.57              |
| <b>1a</b> | THF              | 0.2086     | 347                                   | 562                                  | 215                       | 3.57                  | 5.82              |
| <b>1a</b> | EA               | 0.1990     | 346                                   | 560                                  | 214                       | 3.39                  | 8.00              |
| <b>1a</b> | Dioxane          | 0.0205     | 348                                   | 565                                  | 217                       | 3.60                  | 11.1              |
| <b>1a</b> | TOL              | 0.0153     | 348                                   | 553                                  | 205                       | 3.68                  | 35.6              |

**Table S2.** Optical properties of probe **1b** in different solvents.

| Probe     | Solvents         | $\Delta f$ | $\lambda_{\text{Abs,max}}^{\text{a}}$ | $\lambda_{\text{Em,max}}^{\text{a}}$ | Stokes shift <sup>a</sup> | $\epsilon^{\text{b}}$ | $\Phi^{\text{c}}$ |
|-----------|------------------|------------|---------------------------------------|--------------------------------------|---------------------------|-----------------------|-------------------|
| <b>1b</b> | H <sub>2</sub> O | 0.3200     | 364                                   | 572 <sup>d</sup>                     | 208                       | 1.00                  | 0.51              |
| <b>1b</b> | DMSO             | 0.2640     | 366                                   | 568 <sup>d</sup>                     | 202                       | 1.02                  | 0.63              |
| <b>1b</b> | MeCN             | 0.3040     | 366                                   | 557                                  | 191                       | 0.98                  | 1.42              |
| <b>1b</b> | MeOH             | 0.3092     | 366                                   | 555                                  | 189                       | 0.96                  | 1.32              |
| <b>1b</b> | EtOH             | 0.2887     | 366                                   | 556                                  | 190                       | 0.87                  | 1.47              |
| <b>1b</b> | DCM              | 0.2170     | 367                                   | 548                                  | 181                       | 1.04                  | 2.18              |
| <b>1b</b> | THF              | 0.2086     | 366                                   | 541                                  | 175                       | 1.12                  | 3.58              |
| <b>1b</b> | EA               | 0.1990     | 364                                   | 535                                  | 171                       | 1.06                  | 9.93              |
| <b>1b</b> | Dioxane          | 0.0205     | 364                                   | 535                                  | 171                       | 1.24                  | 13.5              |
| <b>1b</b> | TOL              | 0.0153     | 366                                   | 534                                  | 168                       | 0.97                  | 13.2              |

**Table S3.** Optical properties of probes **1c-d** in H<sub>2</sub>O and glycerol.

| Probe     | Solvents         | $\lambda_{\text{Abs,max}}^{\text{a}}$ | $\lambda_{\text{Em,max}}^{\text{a}}$ | Stokes shift <sup>a</sup> | $\epsilon^{\text{b}}$ | $\Phi^{\text{c}}$ |
|-----------|------------------|---------------------------------------|--------------------------------------|---------------------------|-----------------------|-------------------|
| <b>1c</b> | H <sub>2</sub> O | 366                                   | 442                                  | 76                        | 1.65                  | 0.30              |
| <b>1c</b> | Glycerol         | 362                                   | 445                                  | 83                        | 0.93                  | 12.48             |
| <b>1d</b> | H <sub>2</sub> O | 362                                   | 538                                  | 176                       | 0.70                  | 0.12              |
| <b>1d</b> | Glycerol         | 365                                   | 532                                  | 167                       | 0.98                  | 9.20              |

<sup>a</sup> Reported in nm.<sup>b</sup> Reported in 10<sup>4</sup> M<sup>-1</sup> cm<sup>-1</sup>.<sup>c</sup> Reported in %. Coumarin-153 ( $\Phi=0.544$  in ethanol) was used as the reference compound in test.<sup>d</sup> Second highest peak.

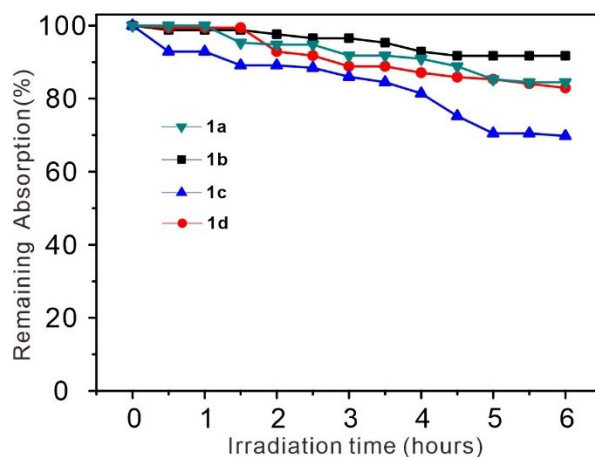

**Fig. S1.** Photofading behaviors of probes **1a-d** in acetonitrile.

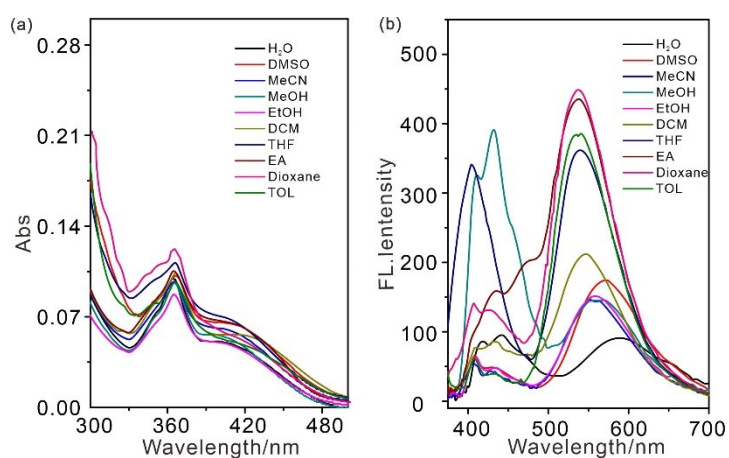

**Fig. S2.** Optical properties of probe **1b** (10 μM) in different solvents. (a) Absorption spectra; (b) emission spectra (excited at 362 nm, slit widths: 5 nm/10 nm).

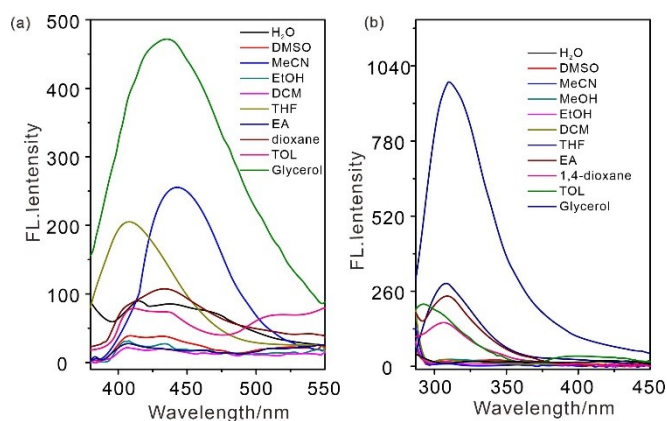

**Fig. S3.** Emission spectra of probes **1c-d** in different solvents. (a) emission spectra of **1c**; (b) emission spectra of **1d**.

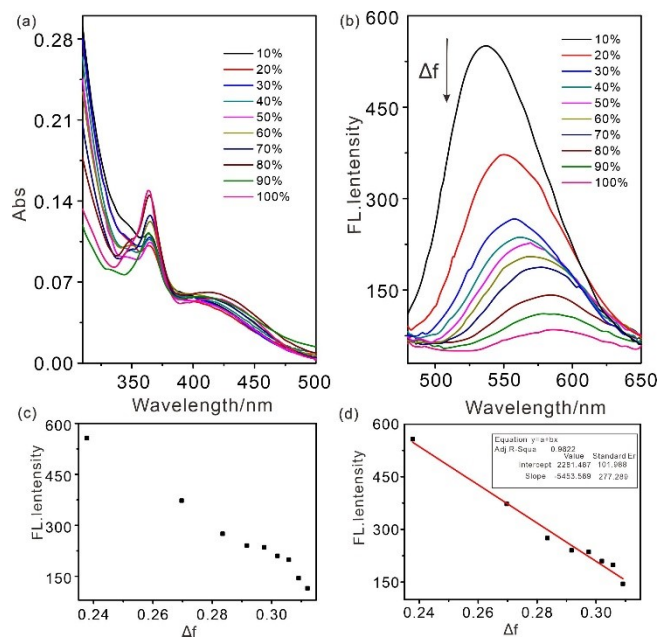

**Fig. S4.** Optical responses of probe **1b** (10  $\mu\text{M}$ ) in dioxane/ $\text{H}_2\text{O}$  mixtures with increasing polarity (water from 10% to 100%). (a) Absorption spectra; (b) emission spectra ( $\lambda_{\text{ex}}=362$  nm, slit widths: 5 nm/10 nm); (c) relationship between fluorescence intensity (570 nm) and  $\Delta f$ ; (d) linear relationship of fluorescence intensity at 570 nm versus  $\Delta f$  (0.238–0.315).

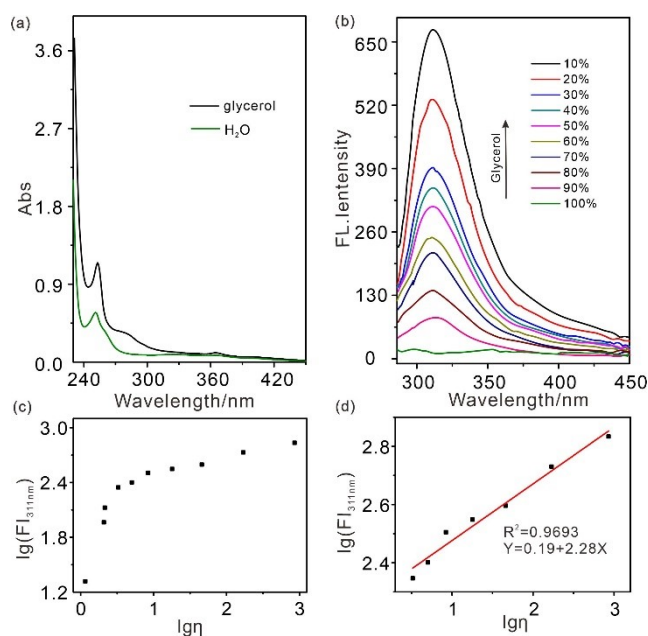

**Fig. S5.** Optical responses of probe **1d** (10  $\mu\text{M}$ ) in glycerol/ $\text{H}_2\text{O}$  mixtures with increasing viscosity (water from 100% to 1%). (a) Absorption spectra; (b) emission spectra ( $\lambda_{\text{ex}}=282$  nm, slit widths: 5 nm/10 nm); (c) relationship between  $\lg(I_{311\text{nm}})$  and  $\lg\eta$ ; (d) linear relationship of  $\lg(I_{311\text{nm}})$  versus  $\lg\eta$ .

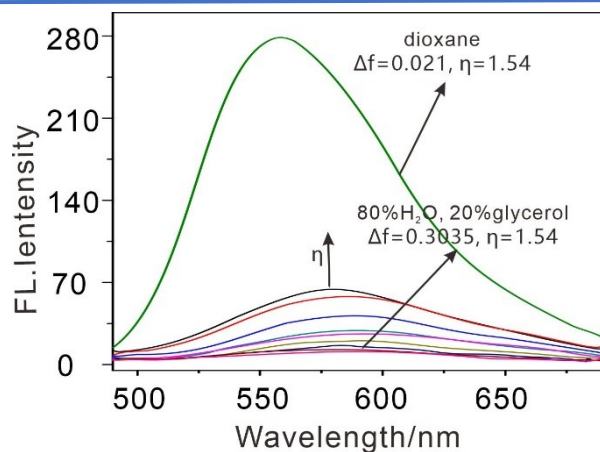

**Fig. S6.** The fluorescence spectra of probe **1a** (10  $\mu\text{M}$ ) in  $\text{H}_2\text{O}$ /glycerol mixture under different viscosity.

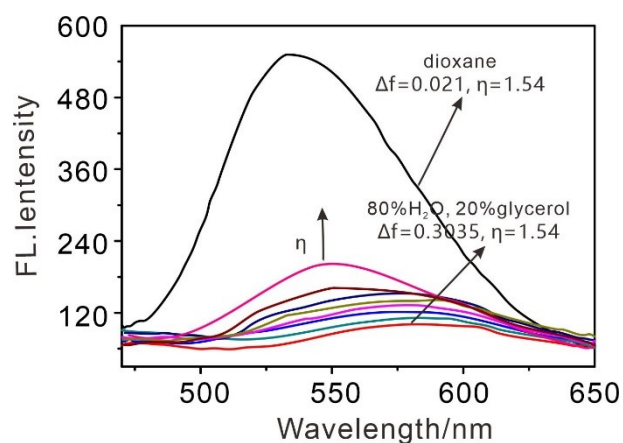

**Fig. S7.** The fluorescence spectra of probe **1b** (10  $\mu\text{M}$ ) in  $\text{H}_2\text{O}$ /glycerol mixture under different viscosity.

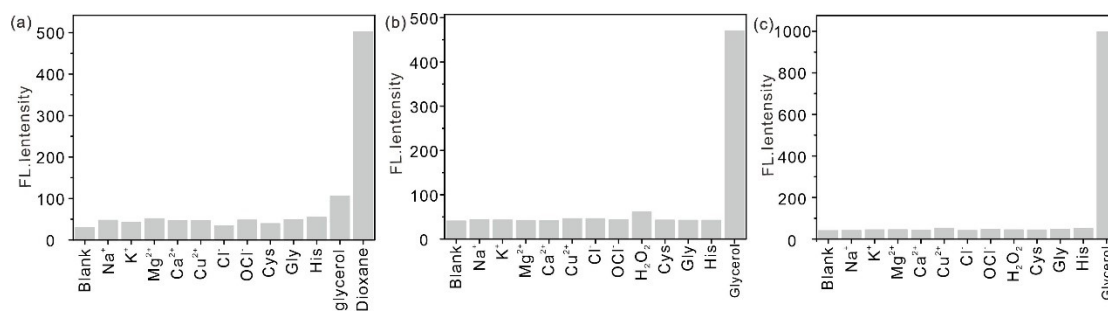

**Fig. S8.** Selectivity experiments of probes **1b-d** (10  $\mu\text{M}$ ) toward different analytes. 5 mM for  $\text{Ca}^{2+}$ ,  $\text{Mg}^{2+}$ ,  $\text{Cu}^{2+}$ ,  $\text{Cl}^-$ ,  $\text{OCl}^-$ ,  $\text{H}_2\text{O}_2$ ; 10 mM for  $\text{K}^+$ ,  $\text{Na}^+$ , Cys, Gly, His. (a) probe **1b** ( $\lambda_{\text{ex}}=362$  nm, slit widths: 5 nm/10 nm). (b) probe **1c** ( $\lambda_{\text{ex}}=360$  nm, slit widths: 5 nm/10 nm). (c) probe **1d** ( $\lambda_{\text{ex}}=282$  nm, slit widths: 5 nm/10 nm).

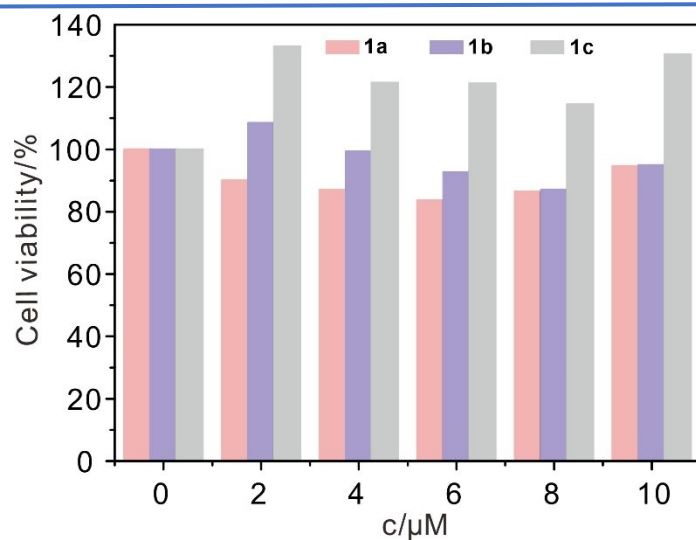

**Fig. S9.** HeLa cells viabilities after treatment with probes **1a-c**. Cell viability was assayed by the CCK-8 method.

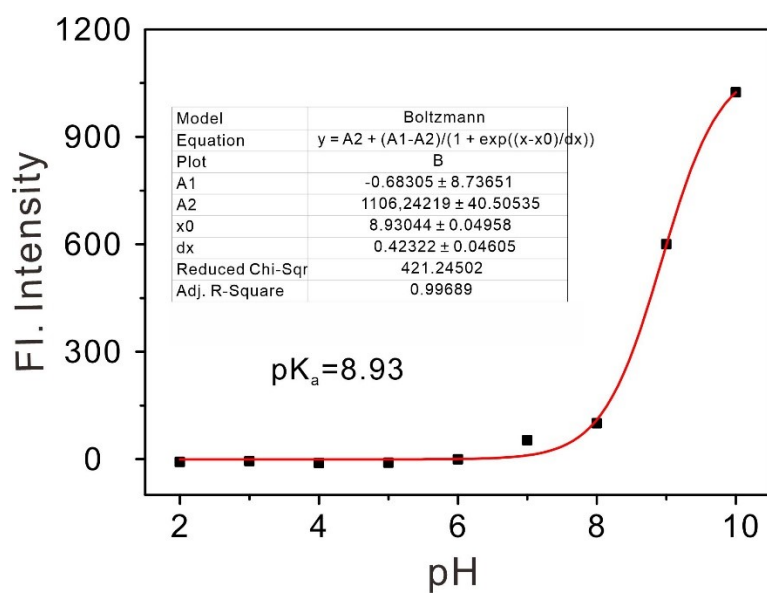

**Fig. S10.** Fluorescence intensity of probe **1b** at different pH.



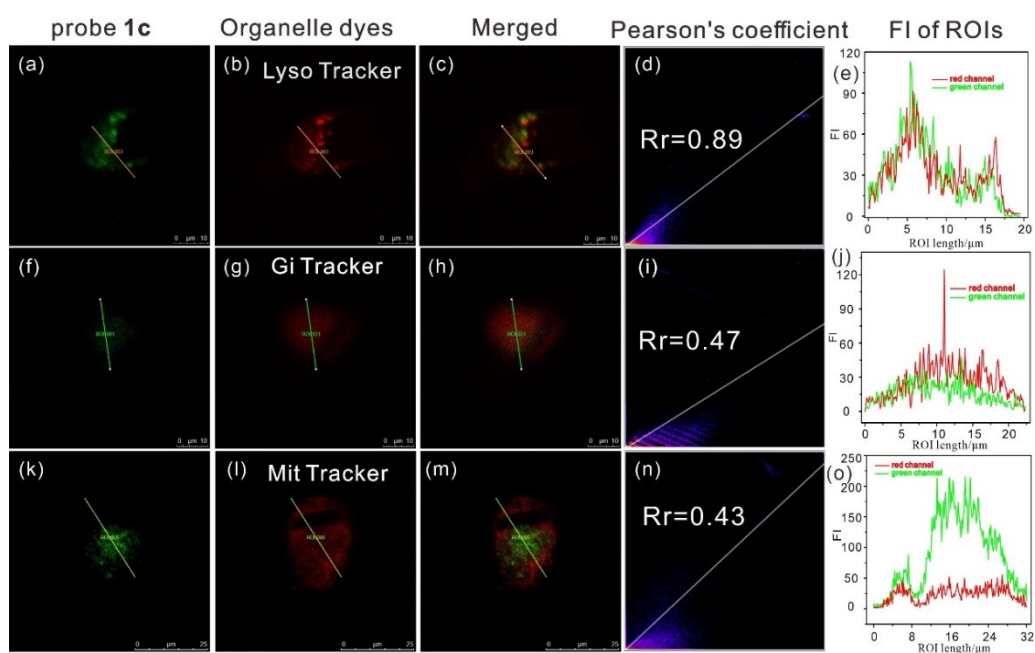

**Fig. S11.** Fluorescence confocal images of living HeLa cells with probe **1c** and ROI analysis: (a, f, k) confocal image (green channel) of cells with probe **1c** (6  $\mu\text{M}$ ); (b, g, l) confocal image (red channel) of cells with Lyso-Tracker Red DND-99 (100 nM), Gi-Tracker Red (100 nM) or Mito-Tracker<sup>®</sup>Red CMXRos (100 nM); (c, h, m) merged image of the green and red channels; (d, i, n) fluorescence intensity correlation plot of the green and red channels; (e, j, o) fluorescence intensities of the regions of interest (ROIs) across the cells.

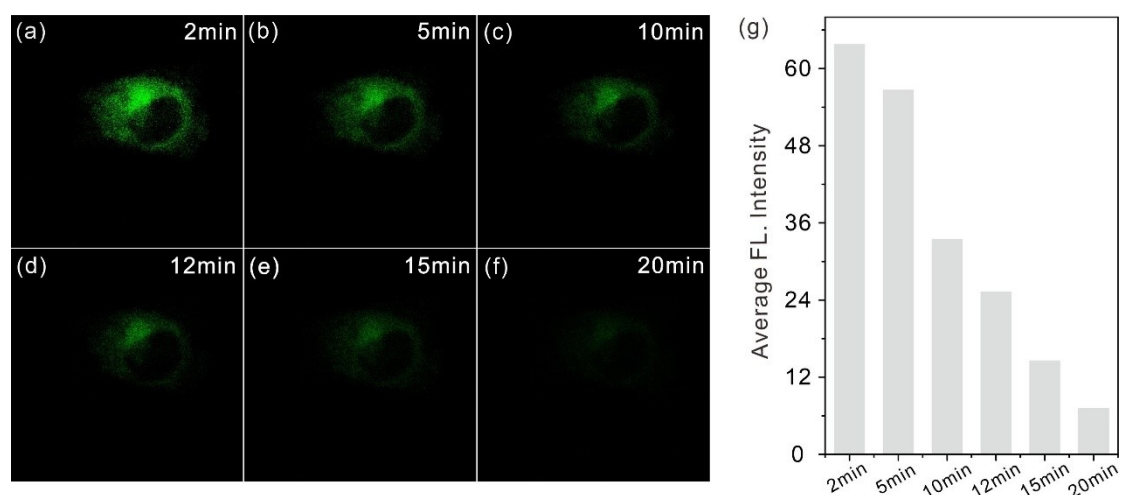

**Fig. S12.** Photobleaching experiment of probe **1c**. (a-f) The cell image of probe **1c** after laser irradiation for different times in HeLa cells. (g) average fluorescence intensity of green channel after irradiation for different times.

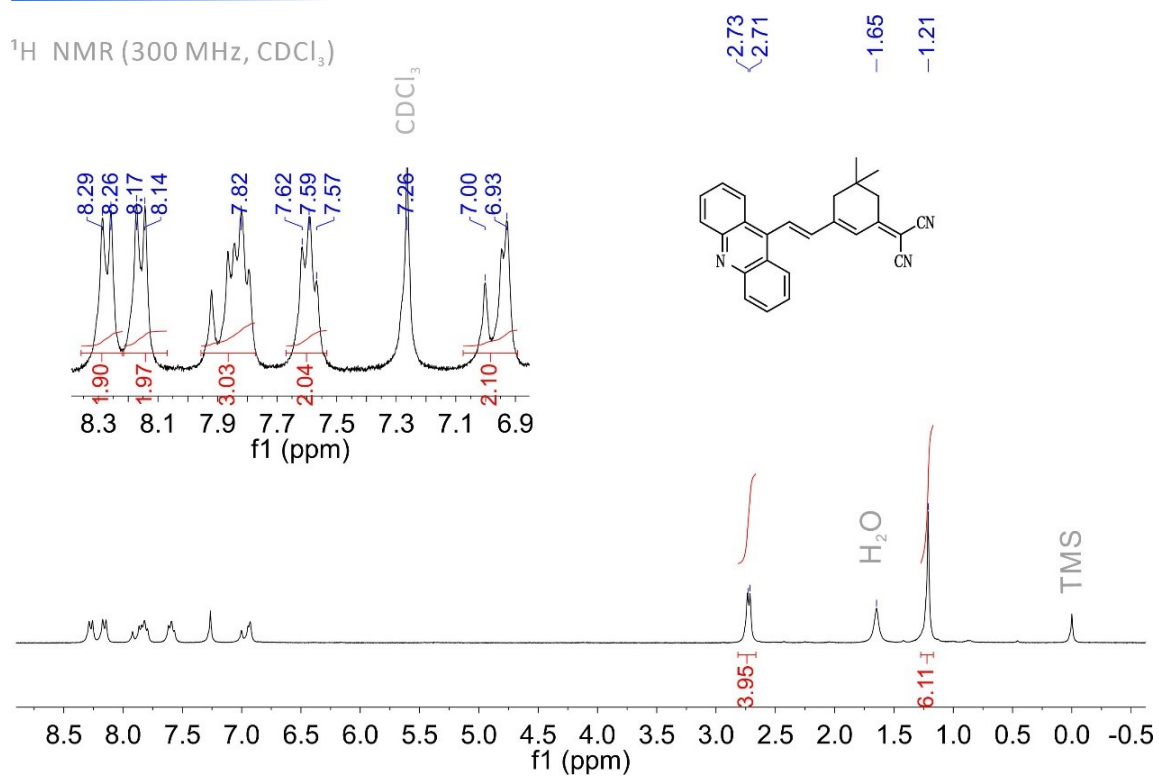Fig. S13.  $^1\text{H}$  NMR spectrum of probe **1a**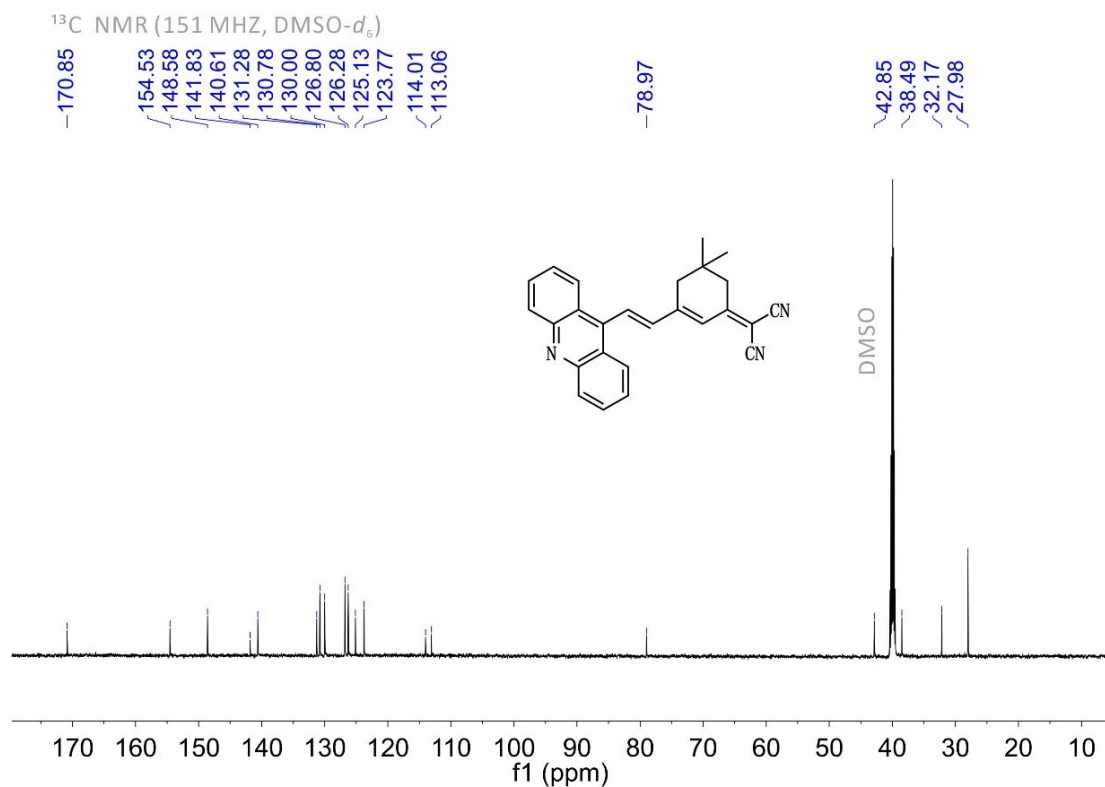Fig. S14.  $^{13}\text{C}$  NMR spectrum of probe **1a**

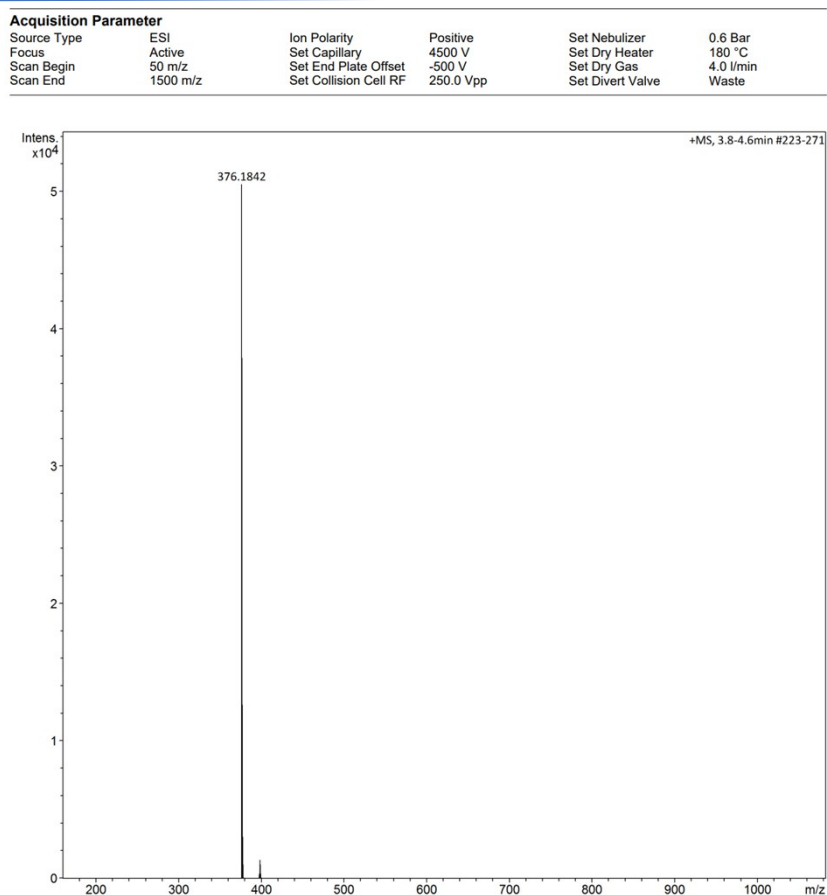Fig. S15. HRMS(ESI<sup>+</sup>) spectrum of probe 1a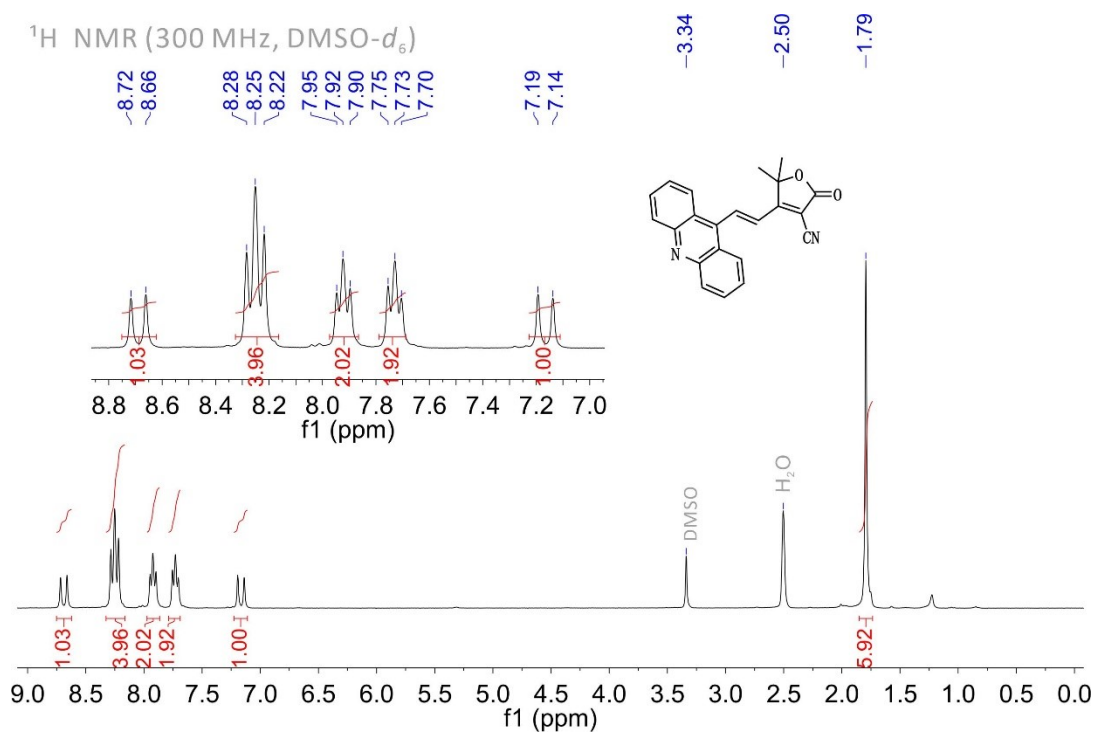Fig. S16 <sup>1</sup>H NMR spectrum of probe 1b

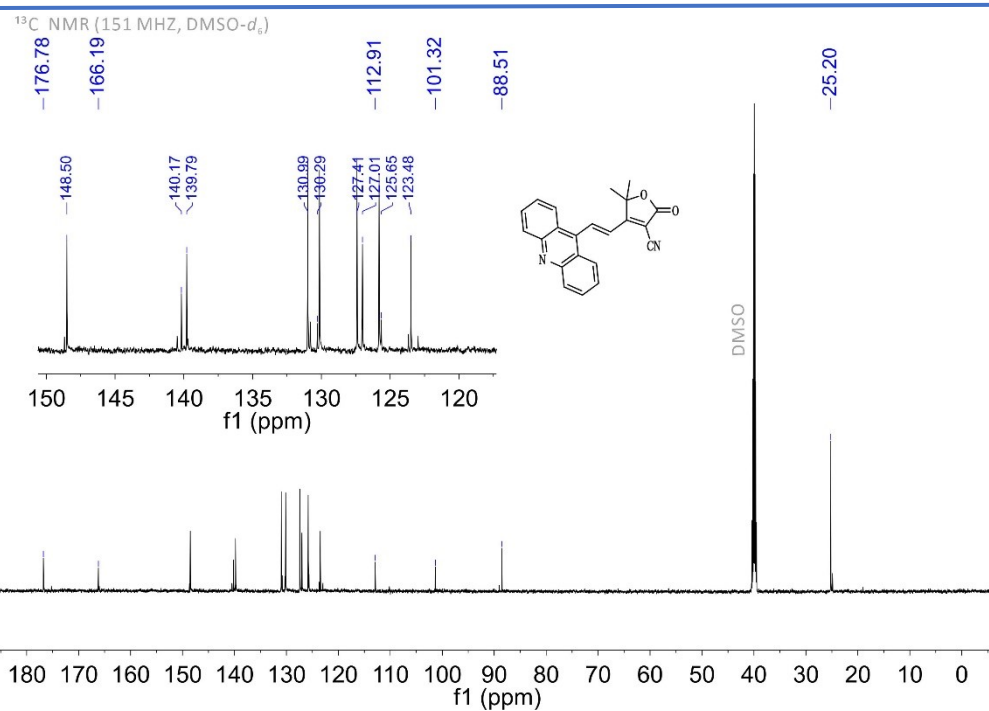**Fig. S17** <sup>13</sup>C NMR spectrum of probe **1b**

| Acquisition Parameter |          |                       |           |                  |           |
|-----------------------|----------|-----------------------|-----------|------------------|-----------|
| Source Type           | ESI      | Ion Polarity          | Positive  | Set Nebulizer    | 0.6 Bar   |
| Focus                 | Active   | Set Capillary         | 4500 V    | Set Dry Heater   | 180 °C    |
| Scan Begin            | 50 m/z   | Set End Plate Offset  | -500 V    | Set Dry Gas      | 4.0 l/min |
| Scan End              | 1500 m/z | Set Collision Cell RF | 250.0 Vpp | Set Divert Valve | Waste     |

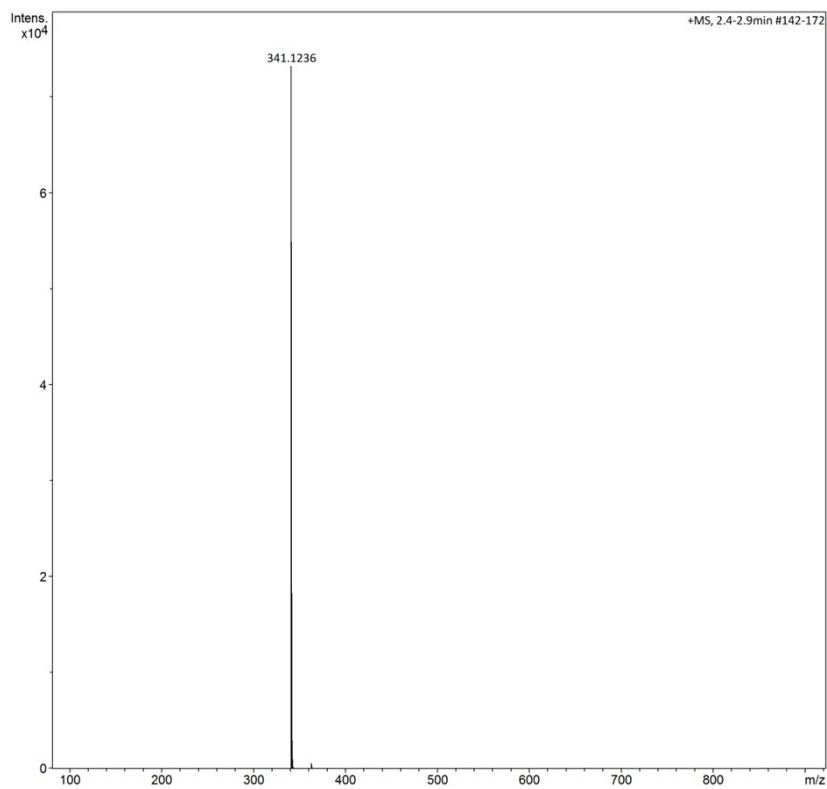**Fig. S18** HRMS(ESI<sup>+</sup>) spectrum of probe **1b**

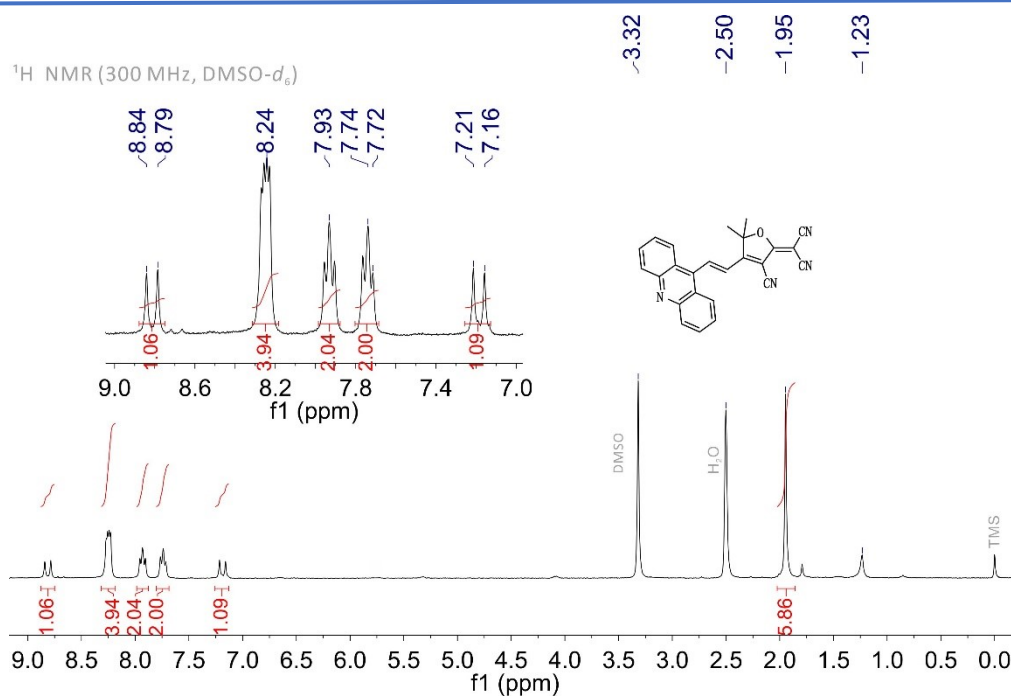Fig. S19 <sup>1</sup>H NMR spectrum of probe **1c****Acquisition Parameter**

|             |          |                       |           |                  |           |
|-------------|----------|-----------------------|-----------|------------------|-----------|
| Source Type | ESI      | Ion Polarity          | Positive  | Set Nebulizer    | 0.6 Bar   |
| Focus       | Active   | Set Capillary         | 4500 V    | Set Dry Heater   | 180 °C    |
| Scan Begin  | 50 m/z   | Set End Plate Offset  | -500 V    | Set Dry Gas      | 4.0 l/min |
| Scan End    | 1500 m/z | Set Collision Cell RF | 250.0 Vpp | Set Divert Valve | Waste     |

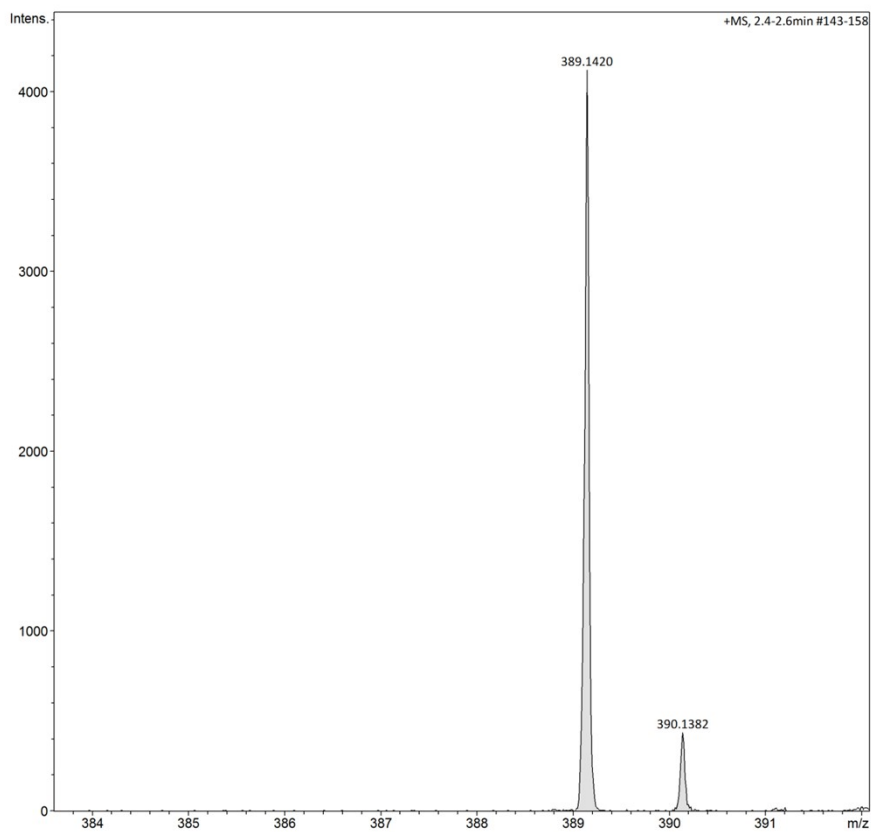Fig. S20 HRMS(ESI<sup>+</sup>) spectrum of probe **1c**

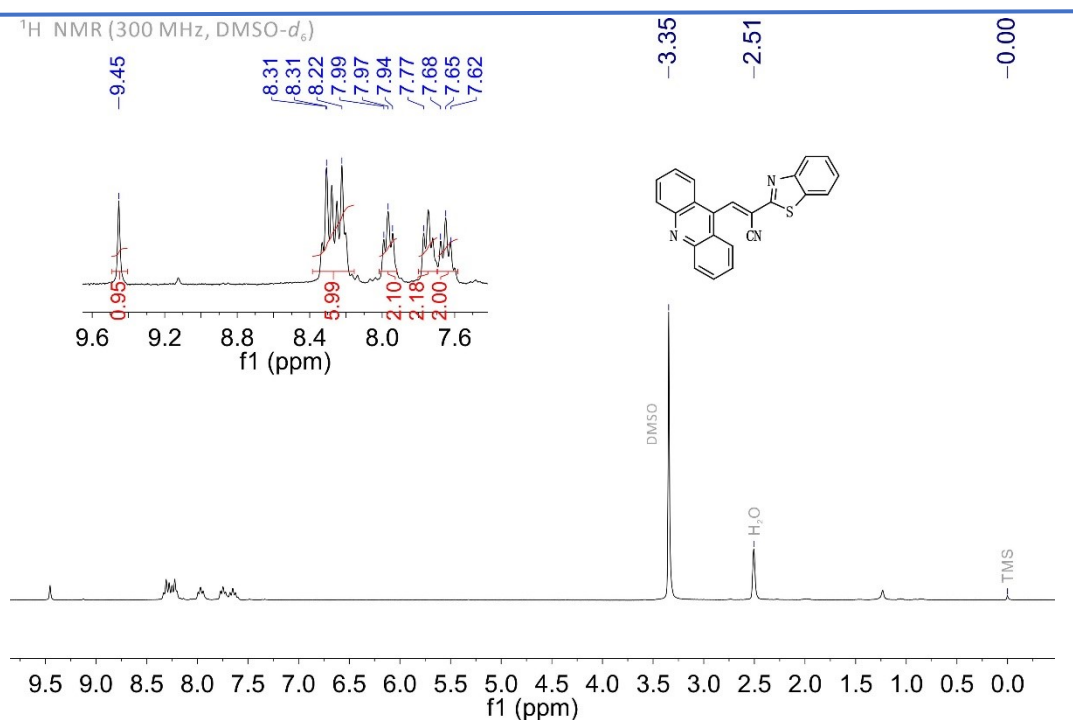Fig. S21 <sup>1</sup>H NMR spectrum of probe **1d**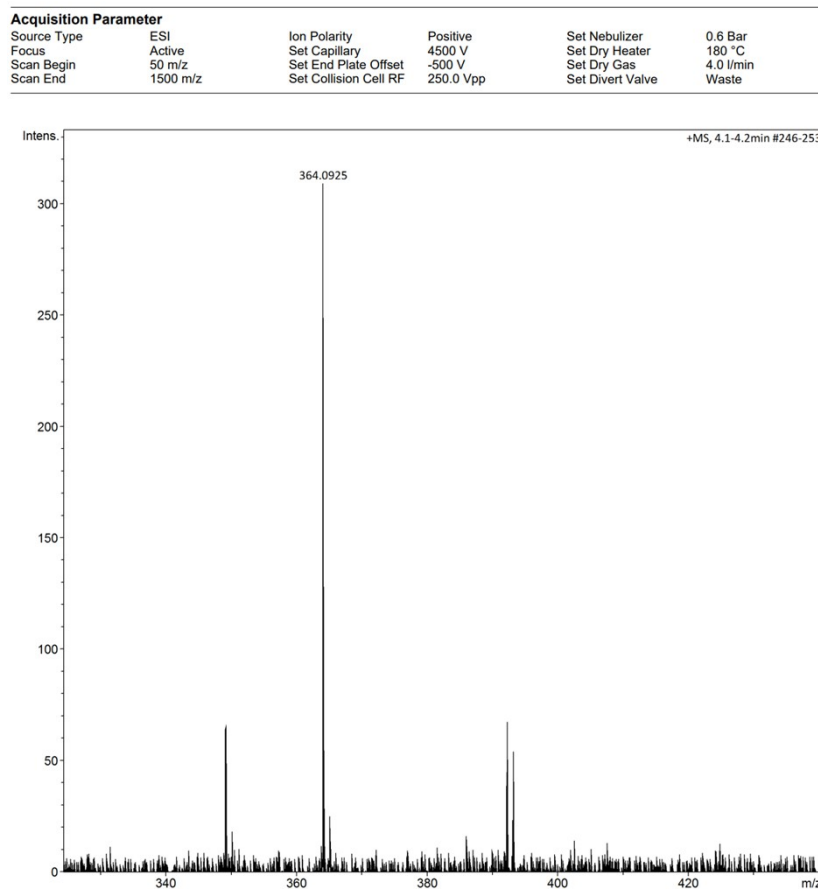Fig. S22. HRMS(ESI<sup>+</sup>) spectrum of probe **1d**
